# Supplementary material for: A mixed-dimensional quasi-1D BiSeI nanowire-2D GaSe nanosheet p–n heterojunction for fast response optoelectronic devices
Source: Royal Society of Chemistry journal article supplement (doi:10.1039/d3na00525a), 2023-01-01
Supplement: d3na00525a1.pdf [file d3na00525a1.pdf]

Supplementary information for:

**Mixed-dimensional quasi-1D BiSeI nanowire-2D GaSe nanosheet p-n heterojunction for fast response optoelectronic devices**

Huijie Hu,<sup>a,b</sup> Weili Zhen,<sup>a</sup> Zhilai Yue,<sup>a</sup> Rui Niu,<sup>a</sup> Feng Xu,<sup>a</sup> Wanli Zhu,<sup>a</sup> Keke Jiao,<sup>a</sup> Mingsheng Long,<sup>c</sup> Chuanying Xi,<sup>\*a</sup> Wenka Zhu,<sup>\*a</sup> and Changjin Zhang<sup>\*a,c,d</sup>

<sup>a</sup> High Magnetic Field Laboratory of Anhui Province, HFIPS, Chinese Academy of Sciences, Hefei 230031, China.

<sup>b</sup> Science Island Branch of Graduate School, University of Science and Technology of China, Hefei 230026, China.

<sup>c</sup> Information Materials and Intelligent Sensing Laboratory of Anhui Province, Institutes of Physical Science and Information Technology, Anhui University, Hefei 230601, China.

<sup>d</sup> Collaborative Innovation Center of Advanced Microstructures, Nanjing University, Nanjing 210093, China

**\*Corresponding Authors:**

xcy@hmfl.ac.cn, wkzhu@hmfl.ac.cn, zcjin@ustc.edu.cn

**Contents:**

S1. Characterization of GaSe and BiSeI.

S2. The output and transfer characteristic of individual GaSe and BiSeI.

S3. Thickness measurement of the three devices.

S4. Optoelectronic testing of GaSe/BiSeI heterojunction.

S5. The energy band diagrams for GaSe/BiSeI heterostructures.

## S1. Characterization of GaSe and BiSeI.

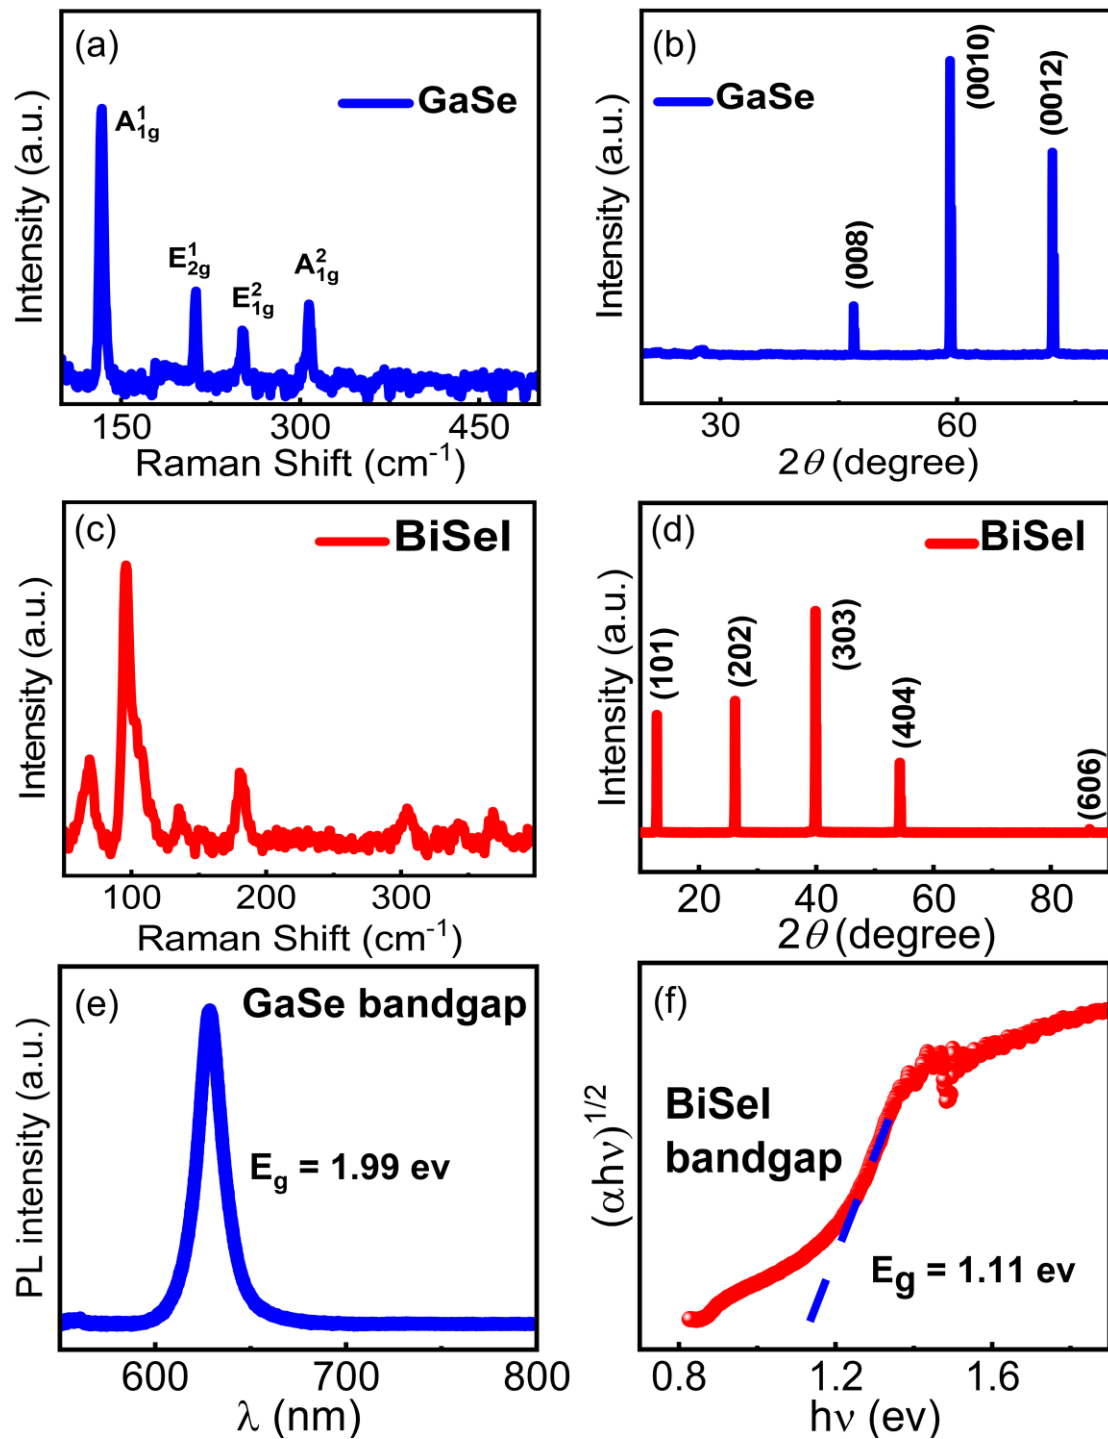

**Figure S1. Characterization of GaSe and BiSeI.** (a, c) Raman spectra showing the characteristic peaks of GaSe and BiSeI. (b, d) X-ray diffraction patterns of GaSe and BiSeI single crystals. (e) The photoluminescence (PL) spectrum of GaSe single crystal. (f) The absorption spectrum of BiSeI crystal.

S2. The output and transfer characteristic of individual GaSe and BiSeI.

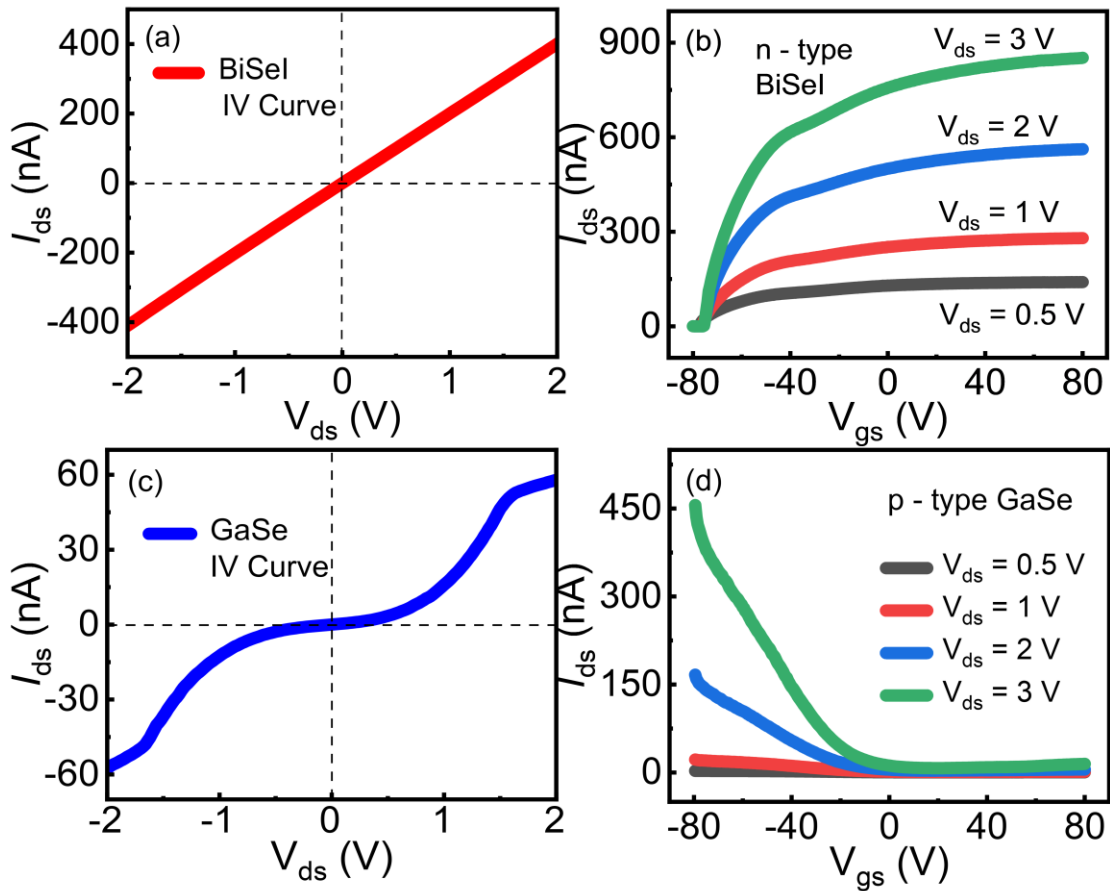

**Figure S2. The output and transfer characteristic of individual GaSe and BiSeI.** (a, c) The output characteristic of individual GaSe and BiSeI. (b, d) The transfer characteristic of the GaSe and BiSeI single crystals.

S3. Thickness measurements of the three devices.

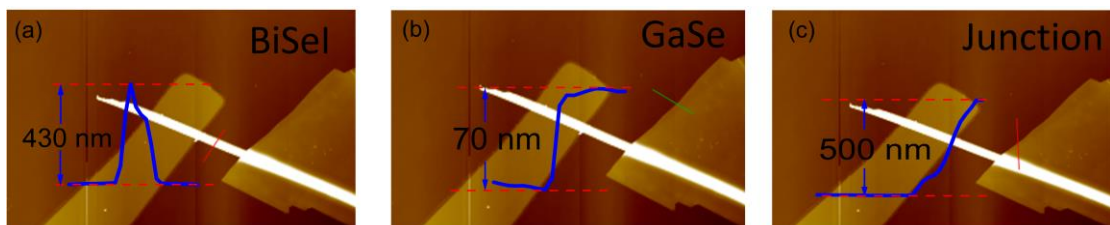

**Figure S3. Atomic Force Microscope (AFM)-based thickness measurements of the three devices.** The thickness of (a) BiSeI, (b) GaSe and (c) BiSeI/GaSe heterojunction in the present study is 430 nm, 70 nm and 500 nm, respectively.

#### S4. Optoelectronic testing of BiSeI/GaSe heterojunction.

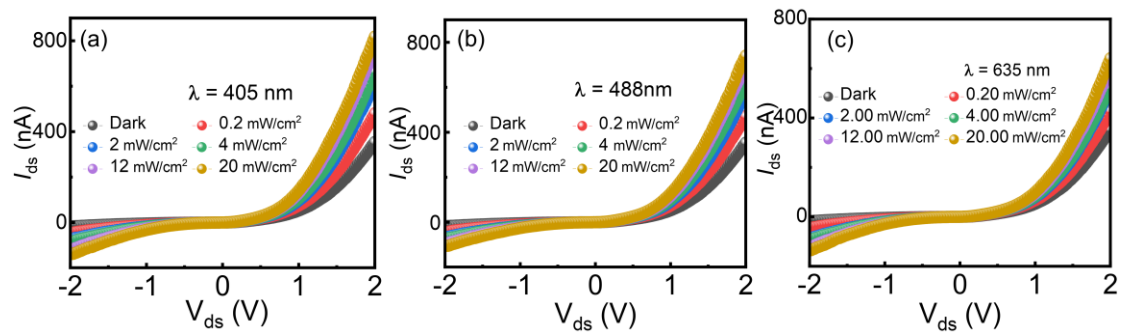

**Figure S4. Optoelectronic testing of BiSeI/GaSe heterojunction.** The  $I - V$  curves under (a) 405 nm, (b) 488nm and (c) 635 nm laser illumination at  $V_{ds} = \pm 2$  V with the power density from 0.2 to 20 mW/cm<sup>2</sup>.

#### S5. The energy band diagrams for GaSe/BiSeI heterojunction.

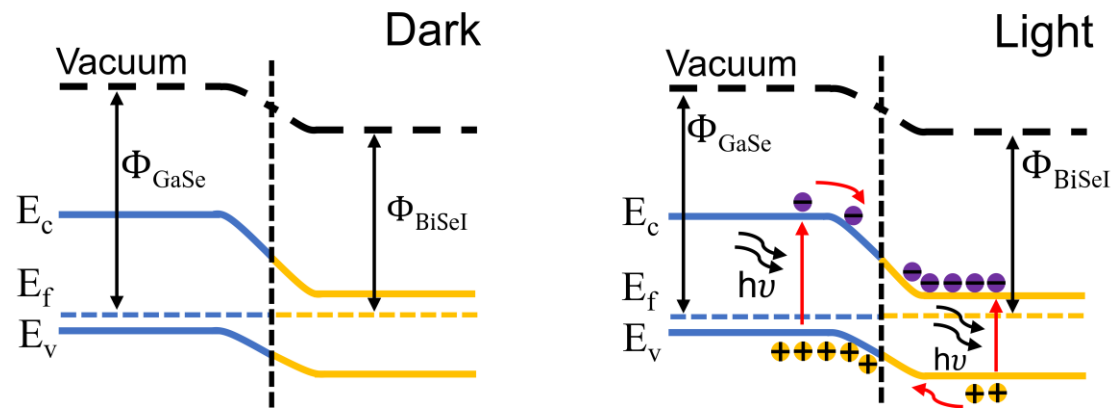

**Figure S5. The energy band diagrams for GaSe/BiSeI heterojunction.** (a, b) The energy band diagrams for GaSe/BiSeI heterojunction in the dark and light, respectively. Here  $\Phi$ ,  $E_f$ ,  $E_c$  and  $E_v$  are the work function, Fermi levels, the energy position of conduction band and valence band, respectively.
